# Supplementary material for: Oligoclonal IgG antibodies in multiple sclerosis target patient-specific peptides
Source: PubMed Central journal article supplement (PMC7034880; doi:10.1371/journal.pone.0228883), 2020-02-21

MS02-19  
Serum CSF

MS04-2  
Serum CSF

MS02-19-G3  
Serum CSF

MS04-2-E12  
Serum CSF

**Fig. 2A**

**Fig. 2C**

**Fig. 2A**

**Fig. 2C**

**Anti-human IgG probe**

Peptide MS02-19-G3

Peptide MS04-2-E12

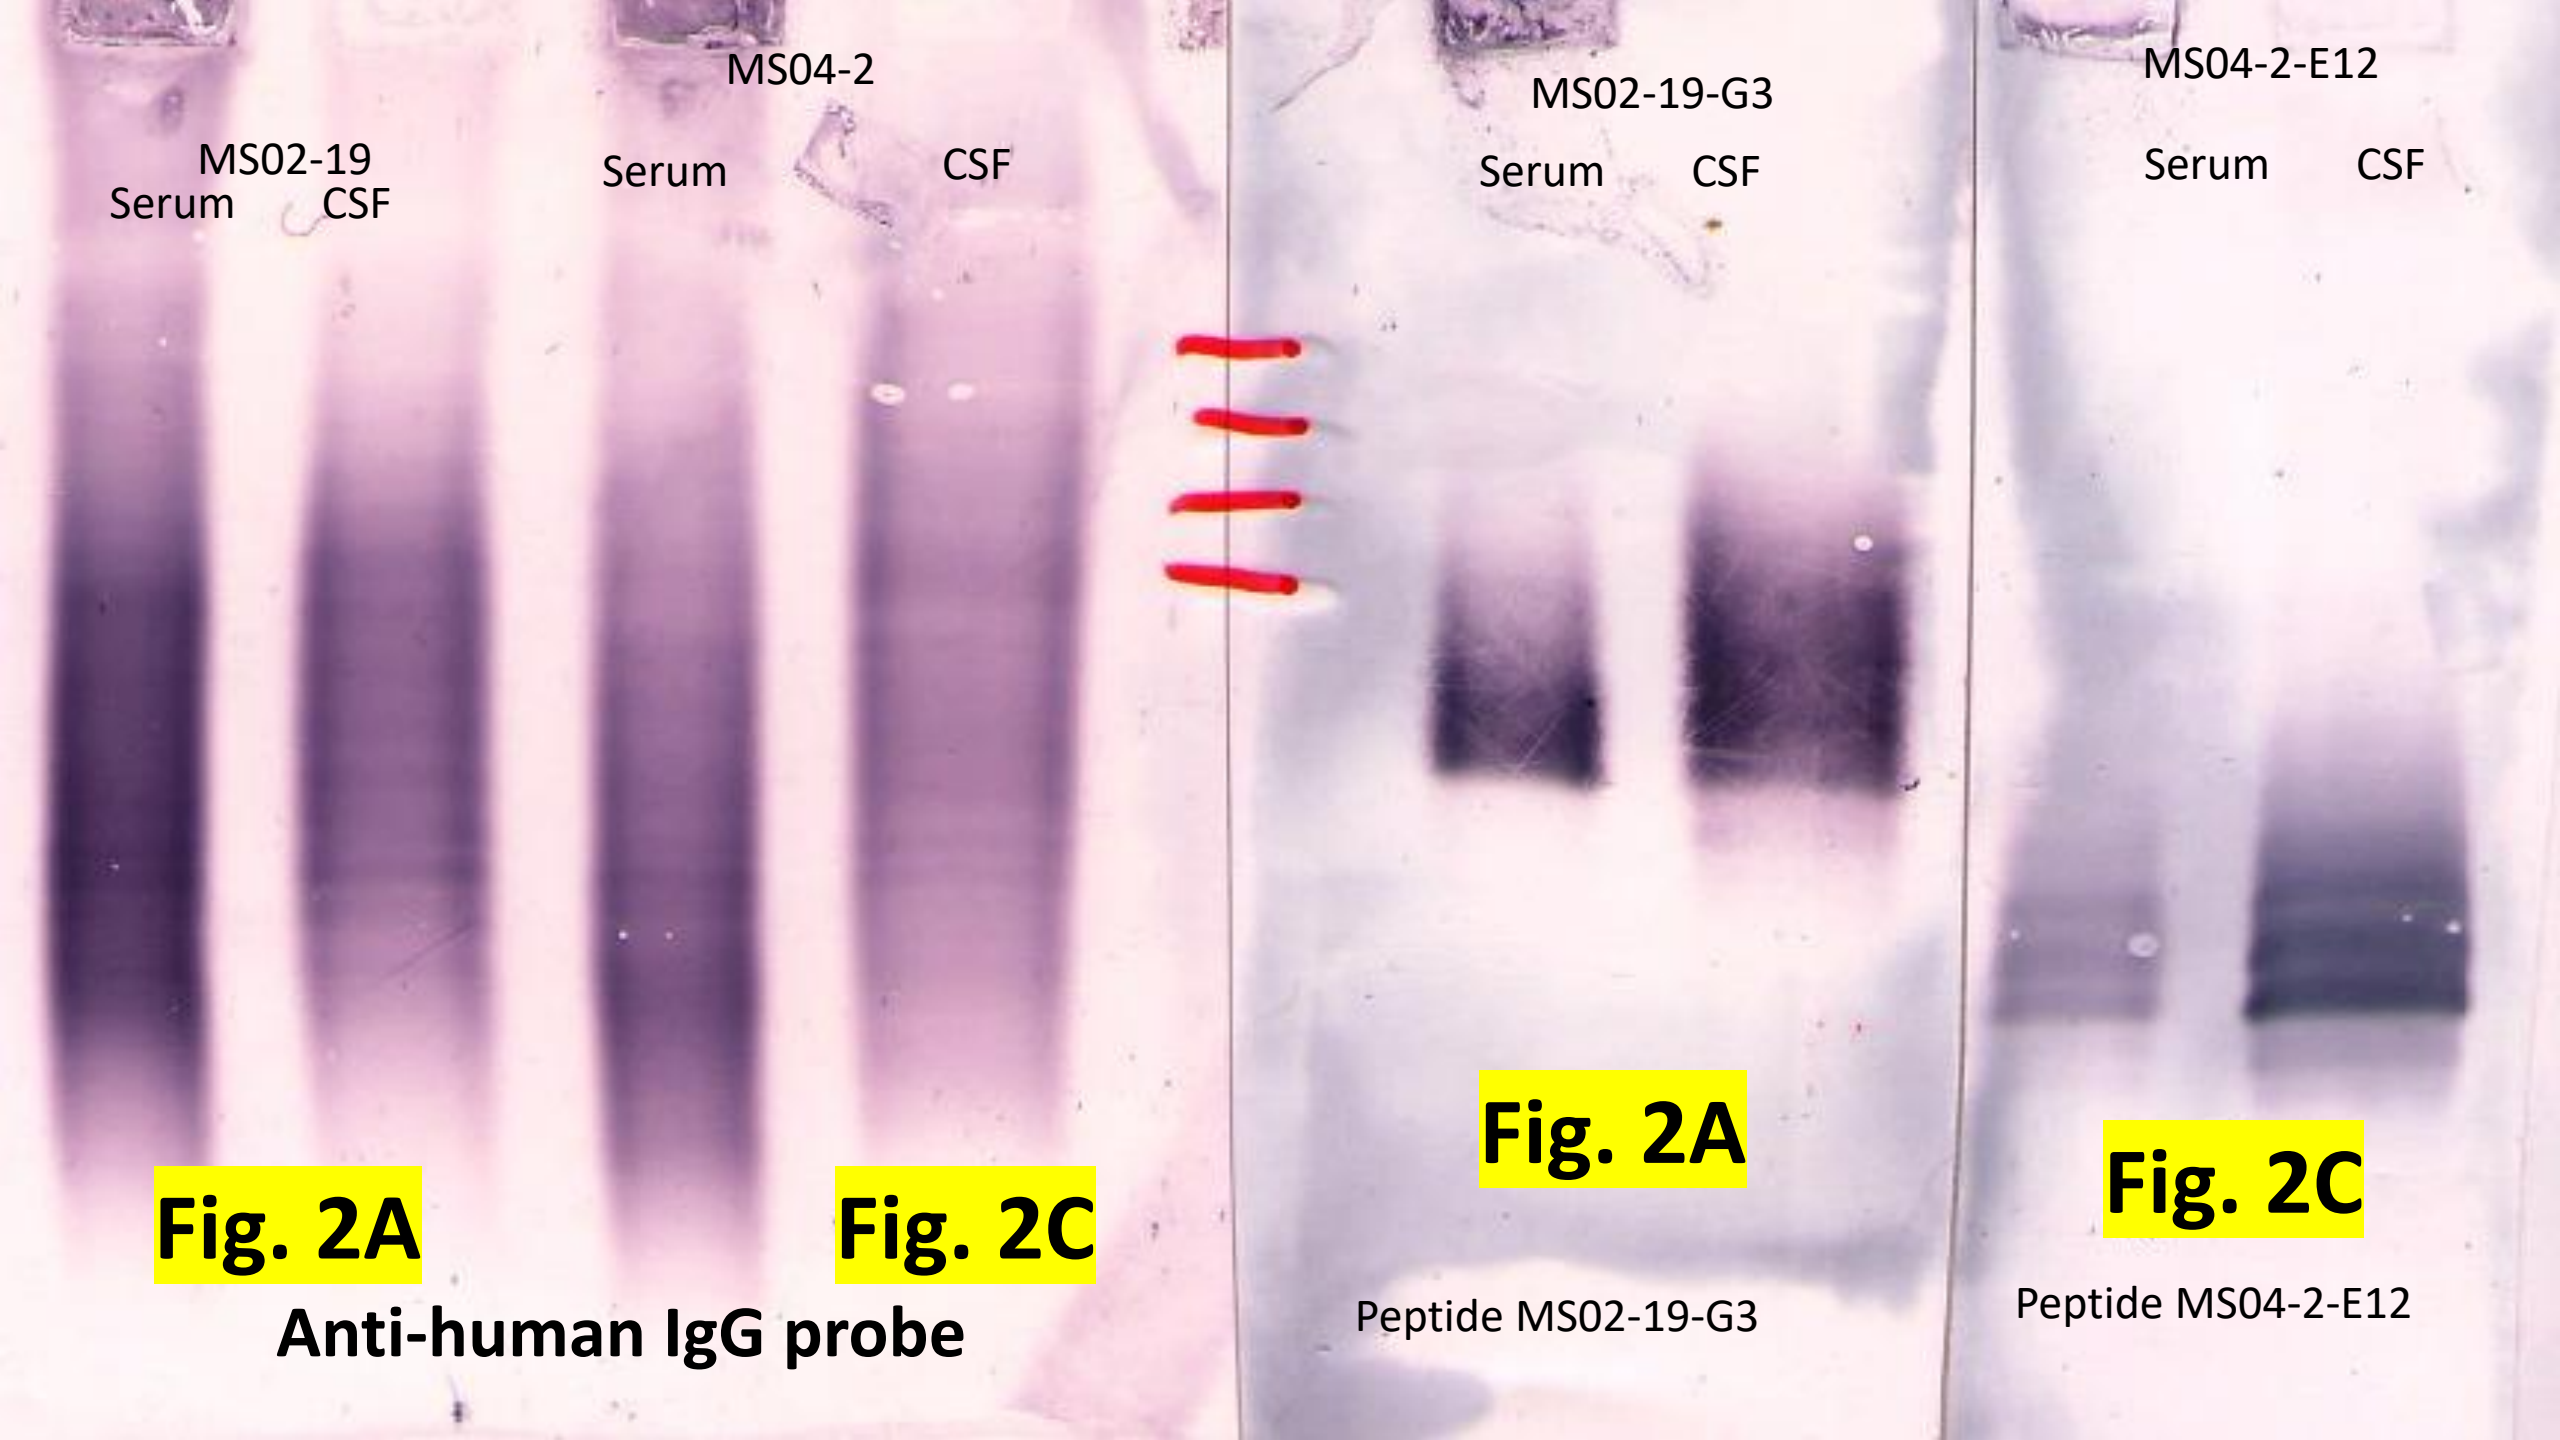

# Peptide MS03-7A2

**Fig. 2B**

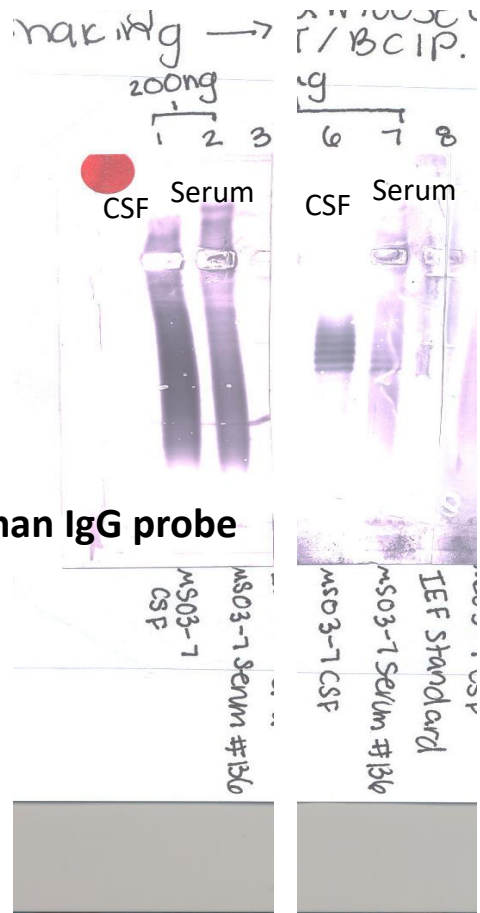

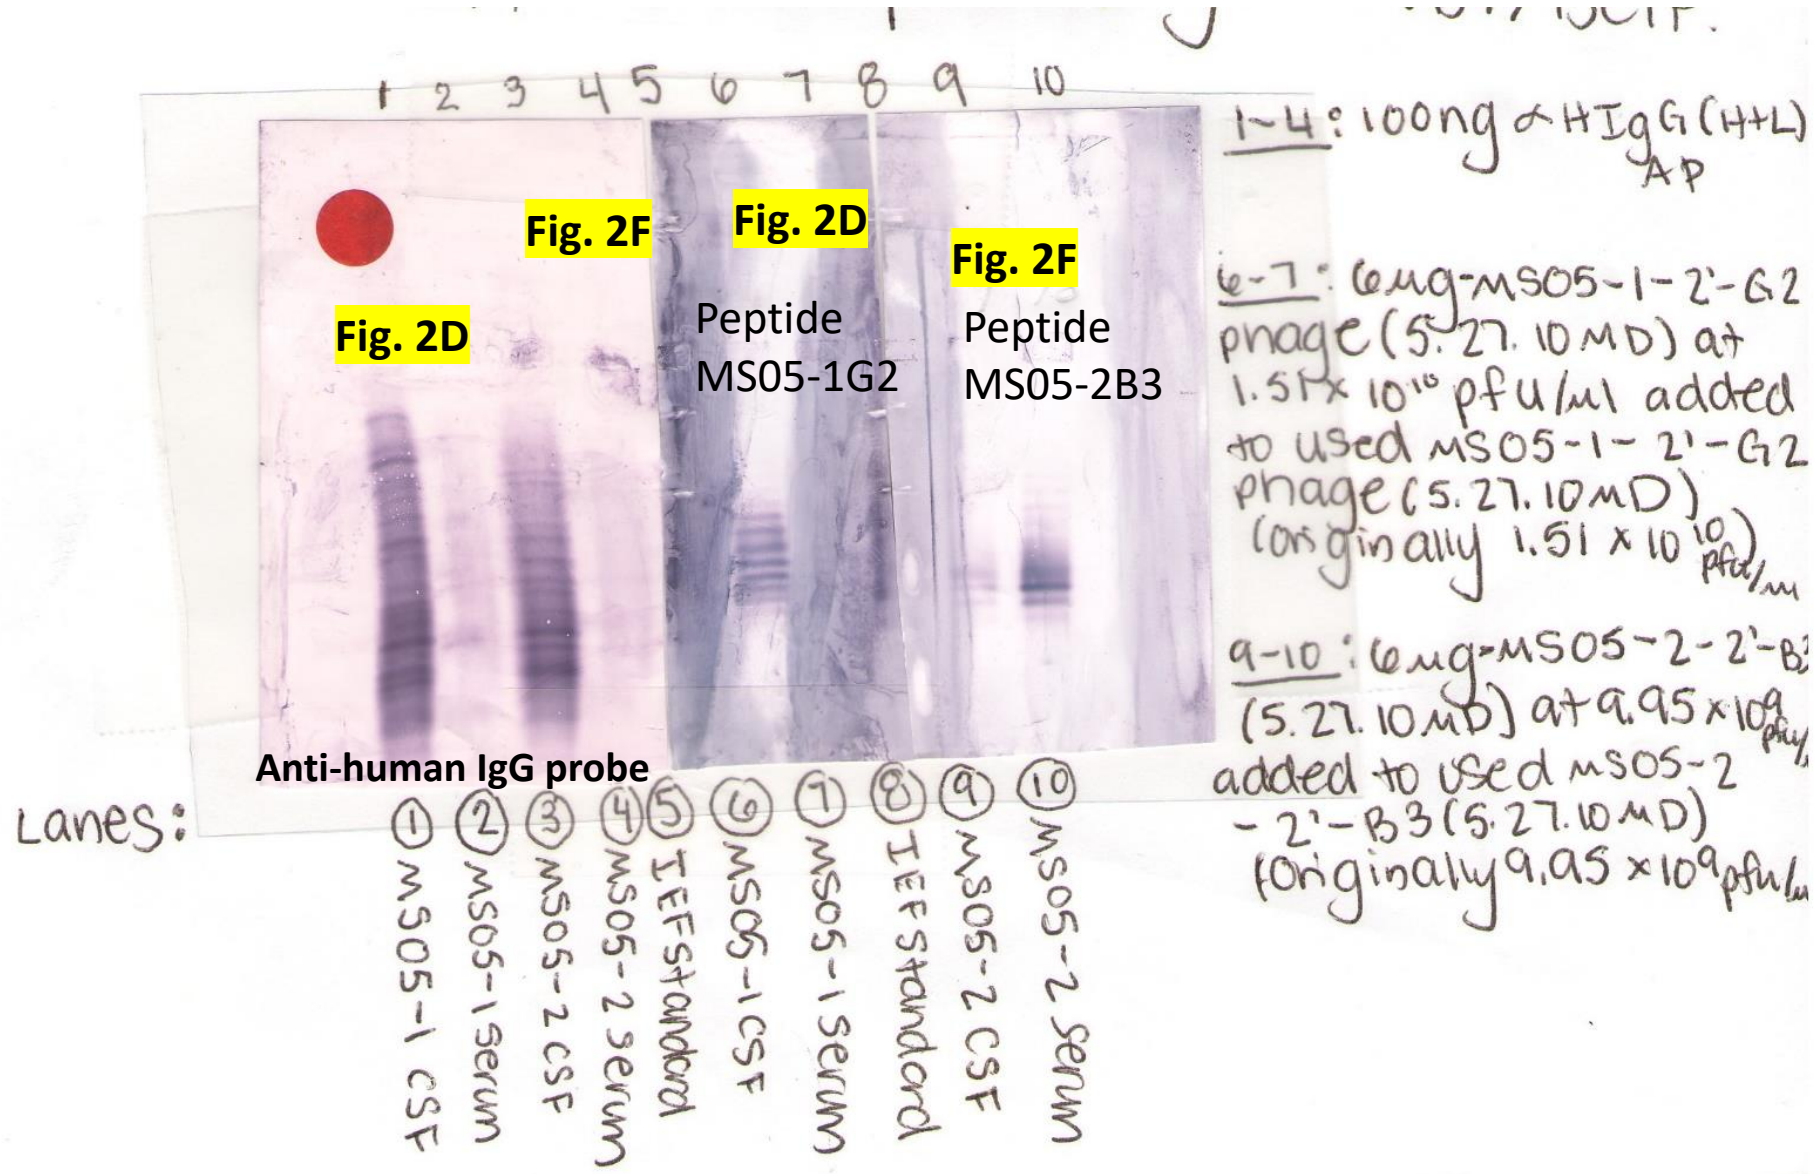

**Fig. 2E**

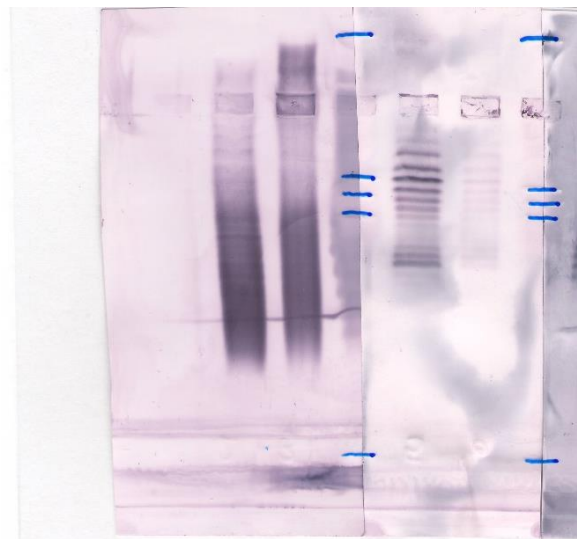

1 IEF standard  
2 MS04-5 Serum #49  
3 IEF standard  
4 MS04-5 CSF  
5 IEF standard  
6 MS04-5 CSF  
7 empty

• 1:1000  
 $\alpha$ HIgG(H+L)  
JAP

•  $1 \times 10^{11}$  pfu/ml  
MS04-5-  
E11

• 1:500  
 $\alpha$ M13  
monoclonal

**Fig. 2G**

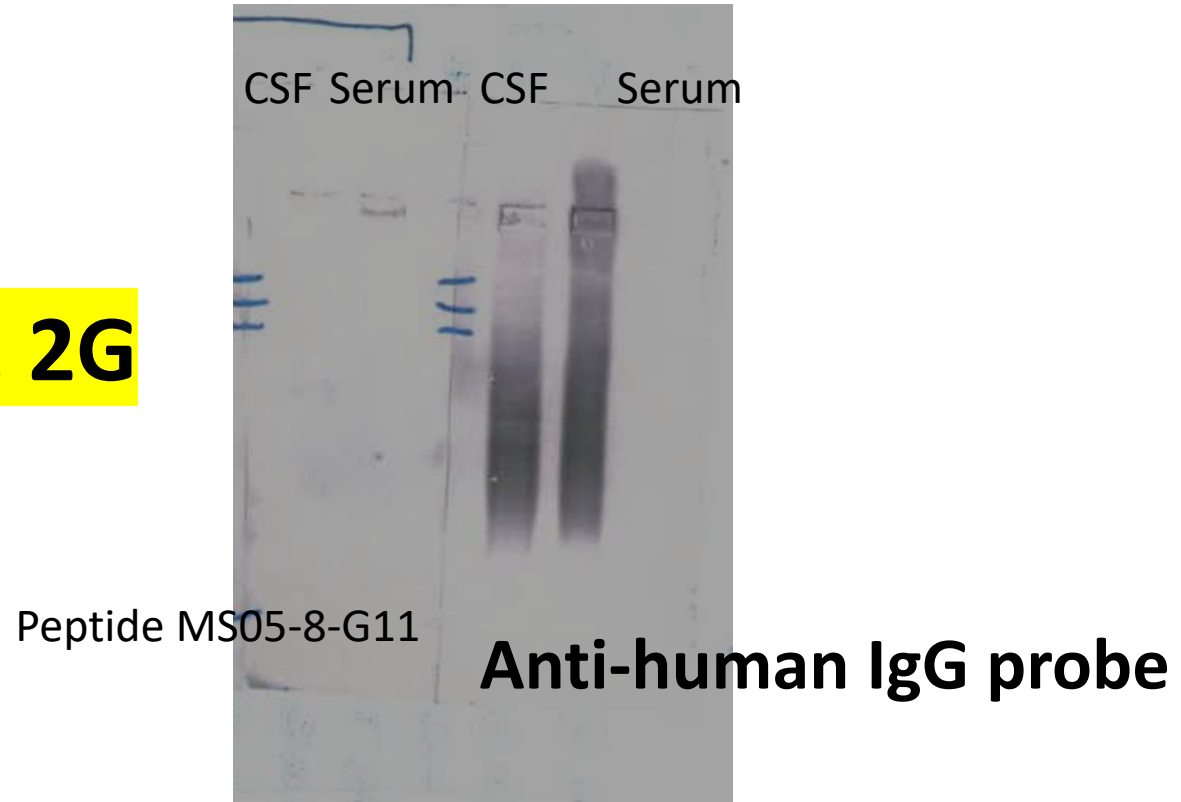

**Fig. 3A** MS #7 phage  
(MS04-3B1)

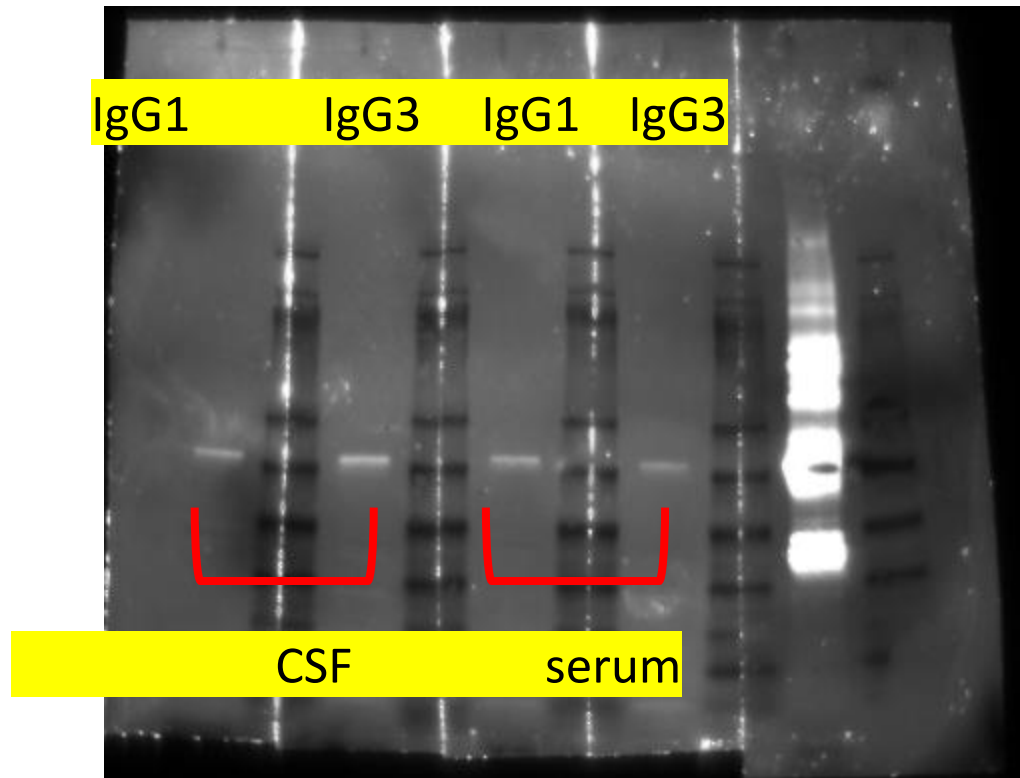



**Fig. 3A MS #13 phage  
(MS07-12-B11\*)**

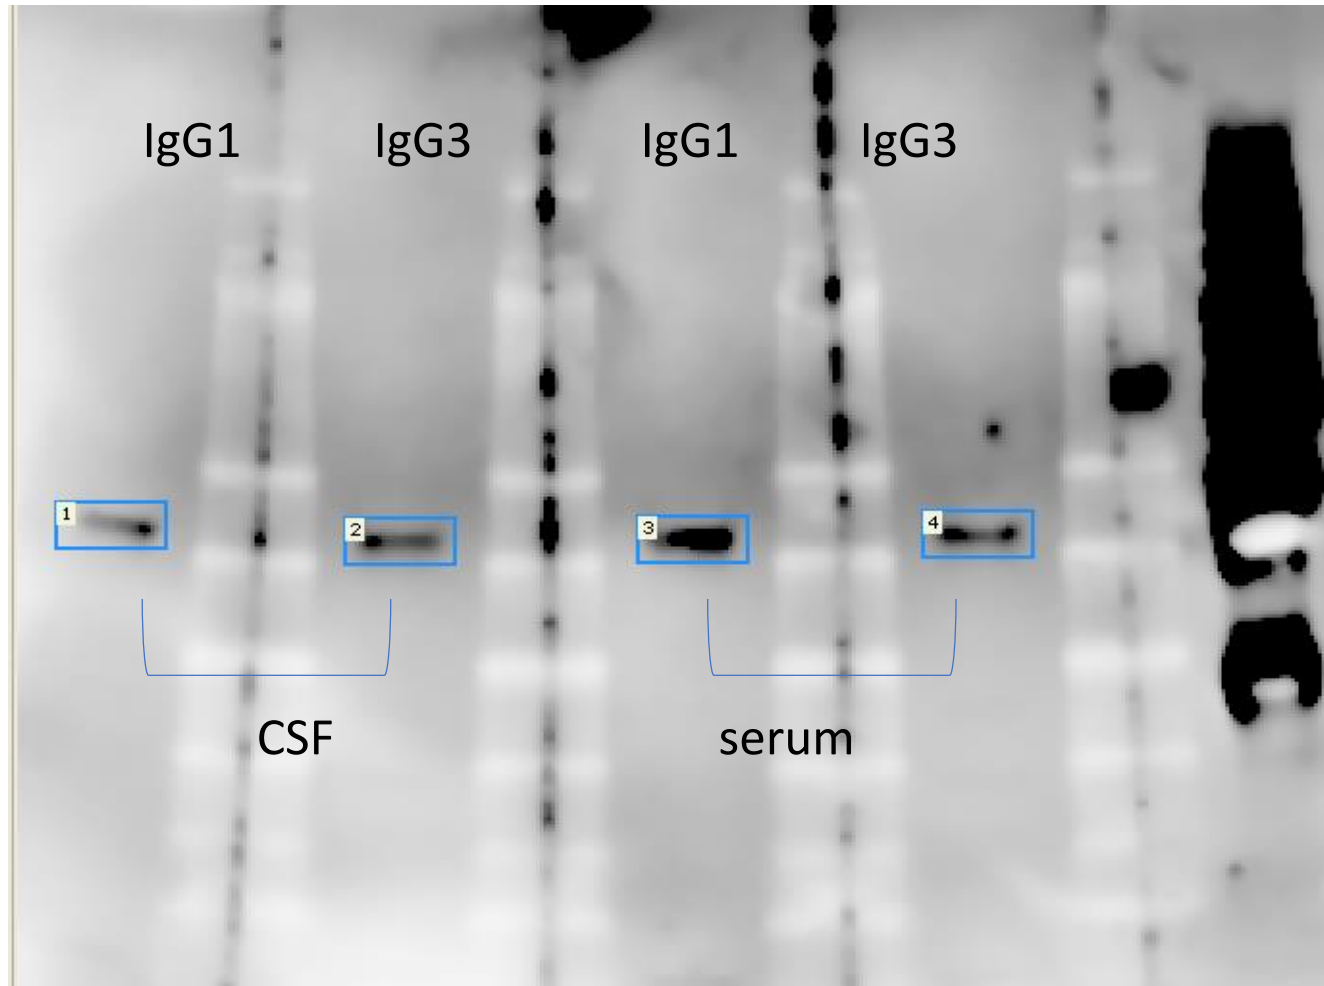

Supplement: pone.0228883.s004.pdf [file pone.0228883.s004.pdf]
